# Supplementary material for: Zeolitic imidazolate framework-8/graphene oxide/magnetic chitosan nanocomposites for efficient removal of Congo red from aqueous solution
Source: Royal Society of Chemistry journal article supplement (doi:10.1039/d1nj03849d), 2021-01-01
Supplement: d1nj03849d1.pdf [file d1nj03849d1.pdf]

Electronic Supplementary Information (ESI) for New Journal of Chemistry.

New Journal of Chemistry

## **Supplementary Information**

Zeolitic imidazolate framework-8/graphene oxide/magnetic  
chitosan nanocomposite for efficient removal of Congo red from  
aqueous solution

Xuefeng Tong, Jingjing Zhang, Qibin Chen\*, Honglai Liu

*State Key Laboratory of Chemical Engineering and School of Chemistry & Molecular  
Engineering, East China University of Science and Technology, Shanghai, 200237,  
P.R. China*

\*Corresponding author E-mail: [qibinchen@ecust.edu.cn](mailto:qibinchen@ecust.edu.cn)

## **1. Procedure for preparing materials**

Graphene oxide/magnetic chitosan (GMCS) was prepared by using a cross-linking method. In brief, 0.9 g chitosan powder (CS) was dissolved in 50 mL acetic acid solution (2%, w/w). Then, 0.5 g Fe<sub>3</sub>O<sub>4</sub> and 120 mL graphene oxide (GO) dispersion (2 mg/mL) were added and stirred for 1 h. After that, 0.5 mL glutaraldehyde solution (25 wt%) was added and stirred until the gel was formed. At last, the gel was dried at 70 °C for 16 h and GMCS was obtained after washing and drying.

For comparison, magnetic chitosan (MCS) was also synthesized using the same method without adding GO at the beginning.

ZIF-8-GMCS contains four components:  $\text{Fe}_3\text{O}_4$ , chitosan (CS), graphene oxide (GO) and ZIF-8. Compared with the other three components, ZIF-8 has the highest adsorption capacity toward Congo red (CR). Therefore, the effect of the ratio of ZIF-8 in ZIF-8-GMCS on the adsorption performance was explored. Since the amount of  $\text{ZnSO}_4 \cdot 7\text{H}_2\text{O}$  used was directly related to the content of ZIF-8 in ZIF-8-GMCS, four samples were synthesized via varying the amount of  $\text{ZnSO}_4 \cdot 7\text{H}_2\text{O}$ , while remaining the other conditions the same.

As shown in Figure S1, the increase in the amount of  $\text{ZnSO}_4 \cdot 7\text{H}_2\text{O}$  gives rise to the incremental proportion of ZIF-8 in ZIF-8-GMCS, thus yielding the increasing adsorption capacity. However, the adsorption capacity obviously levels off when ZIF-8-GMCS is prepared using a higher amount of  $\text{ZnSO}_4 \cdot 7\text{H}_2\text{O}$ .

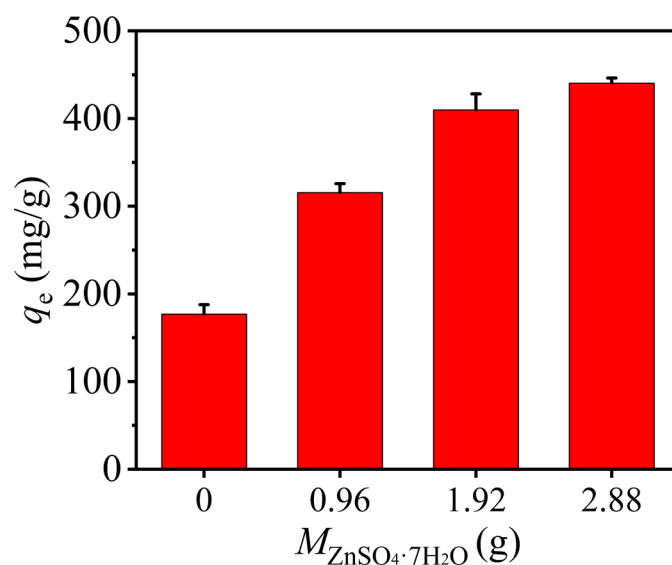

Figure S1. Effect of the mass of  $\text{ZnSO}_4 \cdot 7\text{H}_2\text{O}$  employed on the adsorption capacity toward CR:  $C_{\text{CR}} = 200 \text{ mg/L}$ ,  $t = 24 \text{ h}$  and  $T = 303.15 \text{ K}$ .

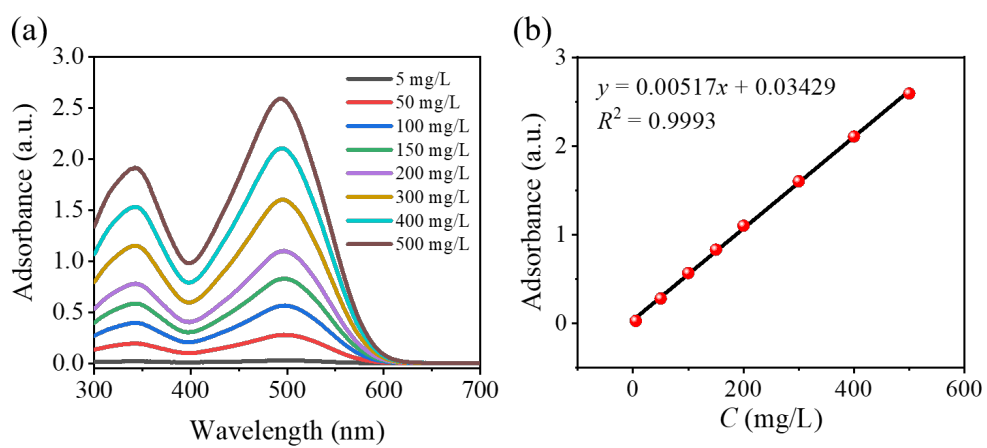

Figure S2. UV-vis spectra of different concentration aqueous solution of Congo red (a); UV-vis standard curve of Congo red solution (b).

In order to explore the effect of other anionic dyes on the adsorption process of Congo red (CR), methyl blue (MB) as the interfering substance. Since MB is also a type of the anionic dye, the competitive adsorption might happen between MB and CR. Therefore, the effect of varying MB concentration, while holding the CR concentration unchanged was examined.

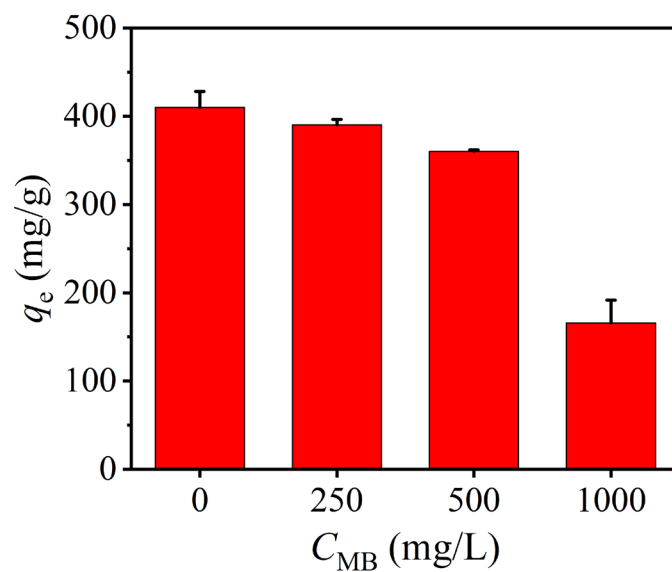

Figure S3. Effect of methyl blue on the adsorption performance, experimental conditions:  $C_{CR} = 250$  mg/L,  $t = 24$  h and  $T = 303.15$  K.

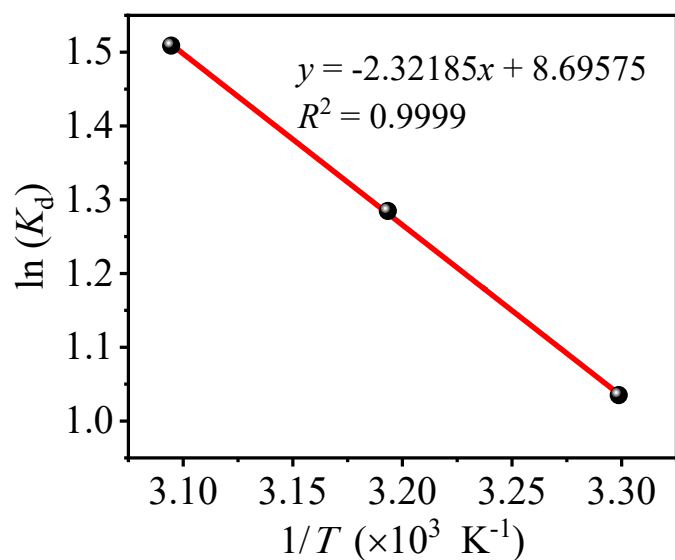

Figure S4. Effect of adsorption temperature on the CR adsorption relationship curve between  $\ln(K_d)$  and  $1/T$ .

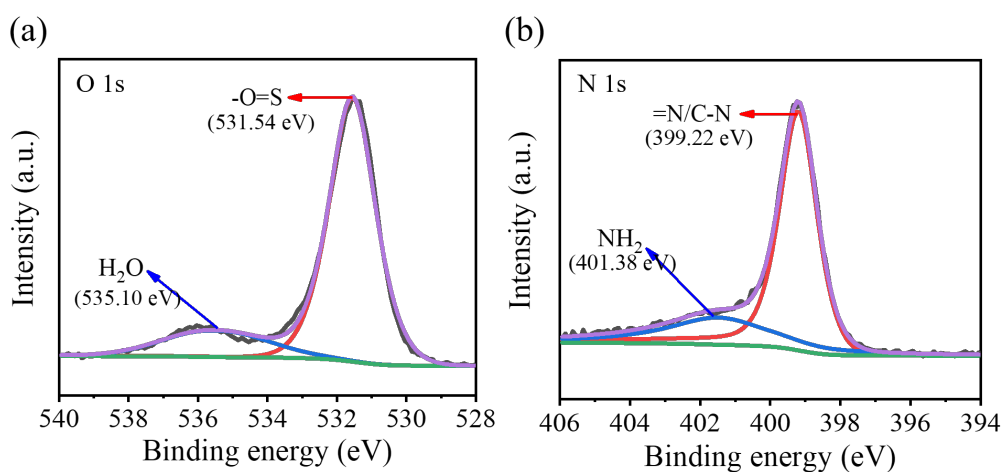

Figure S5. High resolution scans of O 1s (a) and N 1s (b) spectra of Congo red.

Table S1

Kinetic parameters of the adsorption of Congo red with ZIF-8-GMCS.

| $T$<br>(K) | pseudo-first-order model |                             |        | pseudo-second-order model |                                                             |        |
|------------|--------------------------|-----------------------------|--------|---------------------------|-------------------------------------------------------------|--------|
|            | $q_e$<br>(mg/g)          | $k_1$<br>(h <sup>-1</sup> ) | $R^2$  | $q_e$<br>(mg/g)           | $k_2 \times 10^3$<br>(g·h <sup>-1</sup> ·mg <sup>-1</sup> ) | $R^2$  |
| 303.15     | 179.93                   | 0.213                       | 0.9784 | 301.20                    | 2.06                                                        | 0.9998 |
| 313.15     | 245.96                   | 0.196                       | 0.9853 | 381.68                    | 1.24                                                        | 0.9999 |
| 323.15     | 231.91                   | 0.177                       | 0.9715 | 400.00                    | 1.39                                                        | 0.9997 |

Table S2

The Constants and Correlation Coefficients of Langmuir and Freundlich model.

| $T$<br>(K) | Langmuir model  |                 |        | Freundlich model |      |        |
|------------|-----------------|-----------------|--------|------------------|------|--------|
|            | $q_m$<br>(mg/g) | $K_L$<br>(L/mg) | $R^2$  | $K_L$<br>(L/mg)  | $n$  | $R^2$  |
| 303.15     | 476.19          | 0.052           | 0.9963 | 70.76            | 2.63 | 0.9174 |
| 313.15     | 512.82          | 0.105           | 0.9978 | 117.01           | 3.18 | 0.8216 |
| 323.15     | 571.43          | 0.135           | 0.9970 | 140.74           | 3.22 | 0.7863 |

Table S3

Comparison of the maximum adsorption capacity for Congo red from the Langmuir model with other adsorbents.

| Adsorbents                                                      | $q_m$<br>(mg/g) | Temperature<br>(K)  | Ref.         |
|-----------------------------------------------------------------|-----------------|---------------------|--------------|
| Magnetic chitosan grafted MgO                                   | 401.60          | 303.15              | [1]          |
| Metal oxide $Fe_xCo_{3-x}O_4$                                   | 160.3           | Room<br>temperature | [2]          |
| Amine functionalized magnesium ferrite                          | 71.4            | 298.15              | [3]          |
| Magnetic peanut husk grafted aluminum and<br>iminodiacetic acid | 62.5            | 303.15              | [4]          |
| Triethylenetetramine cross-linked<br>magnetic chitosan          | 583.11          | 298.15              | [5]          |
| Magnetic zeolitic imidazolate framework                         | 210.5           | 298.15              | [6]          |
| Iron oxide nanoparticles                                        | 418.41          | 298.15              | [7]          |
| magnetic $CuFe_2O_4$ nanocomposites                             | 434.78          | 298.15              | [8]          |
| Magnetite intercalated bentonite                                | 48.0            | 298.15              | [9]          |
| $ZnFe_2O_4/SiO_2$ /Tragacanth gum magnetic<br>nanocomposite     | 159.90          | 298.15              | [10]         |
| ZIF-8/GO/chitosan/ $Fe_3O_4$ composite                          | 476.19          | 303.15              | This<br>work |

Table S4

Thermodynamic parameters of CR adsorption with ZIF-8-GMCS.

| $T$<br>(K) | $K_d$ | $\Delta G$<br>(kJ/mol) | $\Delta H$<br>(kJ/mol) | $\Delta S$<br>( $J \cdot K^{-1} \cdot mol^{-1}$ ) |
|------------|-------|------------------------|------------------------|---------------------------------------------------|
| 303.15     | 2.82  | -2.37                  |                        |                                                   |
| 313.15     | 3.61  | -3.18                  | 22.17                  | 80.94                                             |
| 323.15     | 4.52  | -3.99                  |                        |                                                   |



## Reference

- 1 Q. Hu, L. Bin, P. Li, F. Fu, G. Guan, X. Hao and B. Tang, *J. Mol. Liq.*, 2021, **331**, 115719.
- 2 J. Liu, N. Wang, H. Zhang and J. Baeyens, *J. Environ. Manage.*, 2019, **238**, 473.
- 3 C. Aoopngan, J. Nonkumwong, S. Phumying, W. Promjantuek, S. Maensiri, P. Noisa, S. Pinitsoontorn, S. Ananta and L. Srisombat, *ACS Appl. Nano Mater.*, 2019, **2**, 5329.
- 4 A. A. Aryee, E. Dovi, R. Han, Z. Li and L. Qu, *J. Colloid Interface Sci.*, 2021, **598**, 69.
- 5 W. Chen, Z. Liu, Q. Tang, B. Du, X. Huang, Y. Mo, L. Fan, H. Luo and F. Chen, *J. Environ. Manage.*, 2021, **293**, 112809.
- 6 X. Chen, X. Lei, H. Zheng, J X. iang, B. Zhang, H. Zhang, C. Lu and Q. Zhang, *Microporous Mesoporous Mater.*, 2021, **311**, 110712.
- 7 K. W. Borth, C. W. Galdino, V. d. C. Teixeira and F. J. Anaissi, *Appl. Surf. Sci.*, 2021, **546**, 149126.
- 8 Y. Zhang, Y. Chen, Z. W. Kang, X. Gao, X. Zeng, M. Liu and D. P. Yang, *Colloids Surf. A Physicochem. Eng. Asp.*, 2021, **612**, 125874.
- 9 N. Belachew and G. Bekele, *Silicon*, 2020, **12**, 603.
- 10 T. Etemadinia, B. Barikbin and A. Allahresani, *Surf. Interfaces*, 2019, **14**, 117.
